# Supplementary material
Source: Elsevier journal article supplement (https://discovery-pp.ucl.ac.uk/1433395/6/mmc5.pdf)
Supplement: mmc5 [file mmc5.pdf]

**Table S3.** Primary reward paradigm. Psychophysiological Interaction (PPI). Regions showing functional connectivity with vmPFC.

| <b>Region</b>          | <b>Voxels</b> | <b>t-value</b> | <b>MNI (x y z)</b> |
|------------------------|---------------|----------------|--------------------|
| Right posterior insula | 198           | 3.72           | 48 -10 10          |
| Left posterior insula  | 269           | 3.49           | -44 -14 10         |
| Left postcentral gyrus | 143           | 4.31           | -54 -36 52         |
| Right brainstem        | 73            | 4.89           | 2 -18 -2           |

Activations are displayed at  $P < 0.05$ , FDR-corrected at the cluster level.
